# Supplementary material for: Salviolone from Salvia miltiorrhiza Roots Impairs Cell Cycle Progression, Colony Formation, and Metalloproteinase-2 Activity in A375 Melanoma Cells: Involvement of P21(Cip1/Waf1) Expression and STAT3 Phosphorylation
Source: MDPI journal article supplement (doi:10.3390/ijms23031121), 2022-01-20
Supplement: s1 [file s1]

## Supporting information

**Figure S1.**  $^1\text{H}$  NMR Spectrum (600 MHz,  $\text{CD}_3\text{OD}$ ) of compound **1**.

**Figure S2.**  $^1\text{H}$  NMR Spectrum (600 MHz,  $\text{CD}_3\text{OD}$ ) of compound **2**.

**Figure S3.**  $^1\text{H}$  NMR Spectrum (600 MHz,  $\text{CD}_3\text{OD}$ ) of compound **3**.

**Figure S4.**  $^1\text{H}$  NMR Spectrum (600 MHz,  $\text{CD}_3\text{OD}$ ) of compound **4**.

**Figure S5.**  $^1\text{H}$  NMR Spectrum (600 MHz,  $\text{CD}_3\text{OD}$ ) of compound **5**.

**Figure S6.**  $^1\text{H}$  NMR Spectrum (600 MHz,  $\text{CD}_3\text{OD}$ ) of compound **6**.

**Figure S7.**  $^1\text{H}$  NMR Spectrum (600 MHz,  $\text{CD}_3\text{OD}$ ) of compound **7**.

**Table S1.**  $^{13}\text{C}$ NMR Data (150 MHz,  $\text{CD}_3\text{OD}$ ,  $\delta$  ppm) of compounds **1-7**.

**Table S2.** LC-MS/MS conditions for quantitation of compounds **1-7** by MRM.

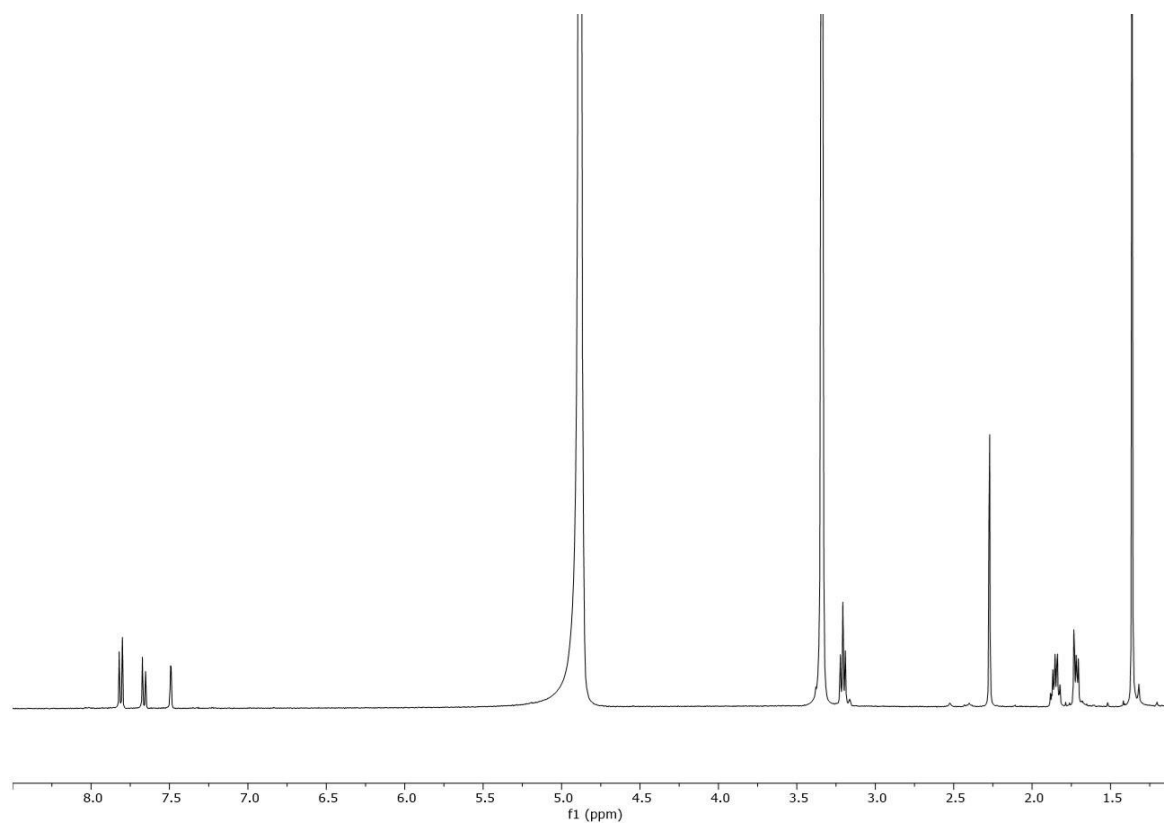

**Figure S1.** <sup>1</sup>H NMR Spectrum (600 MHz, CD<sub>3</sub>OD) of compound **1**.

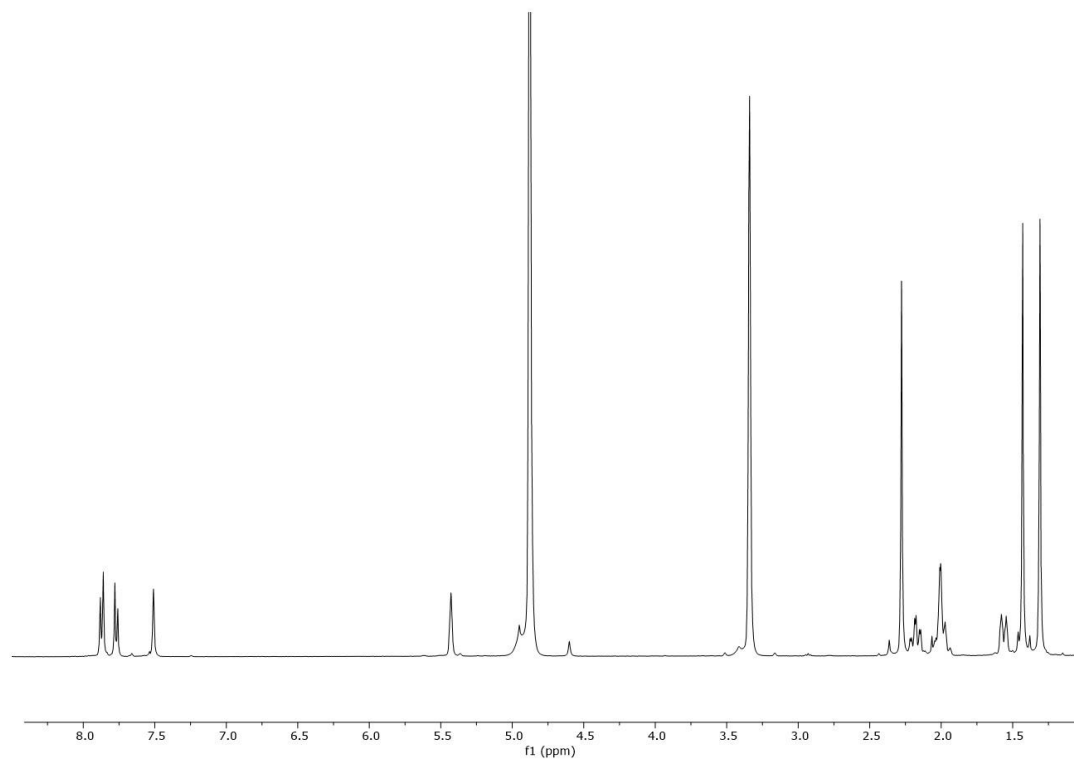

**Figure S2.** <sup>1</sup>H NMR Spectrum (600 MHz, CD<sub>3</sub>OD) of compound **2**.

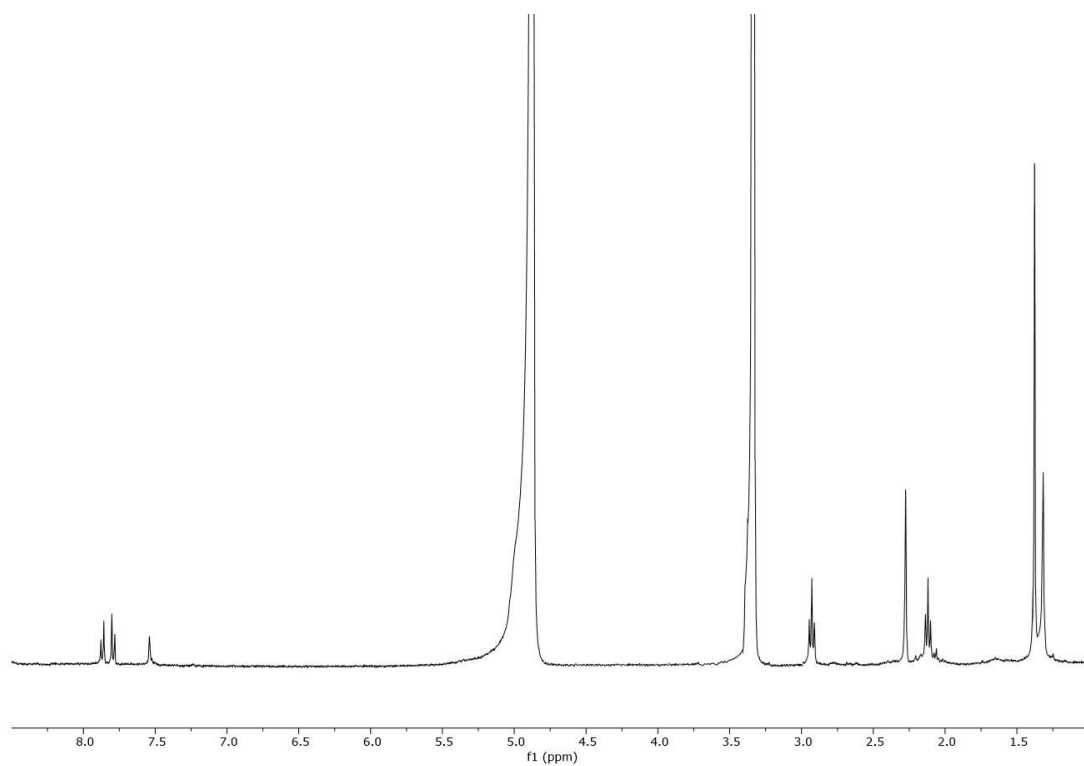

**Figure S3.** <sup>1</sup>H NMR Spectrum (600 MHz, CD<sub>3</sub>OD) of compound **3**.

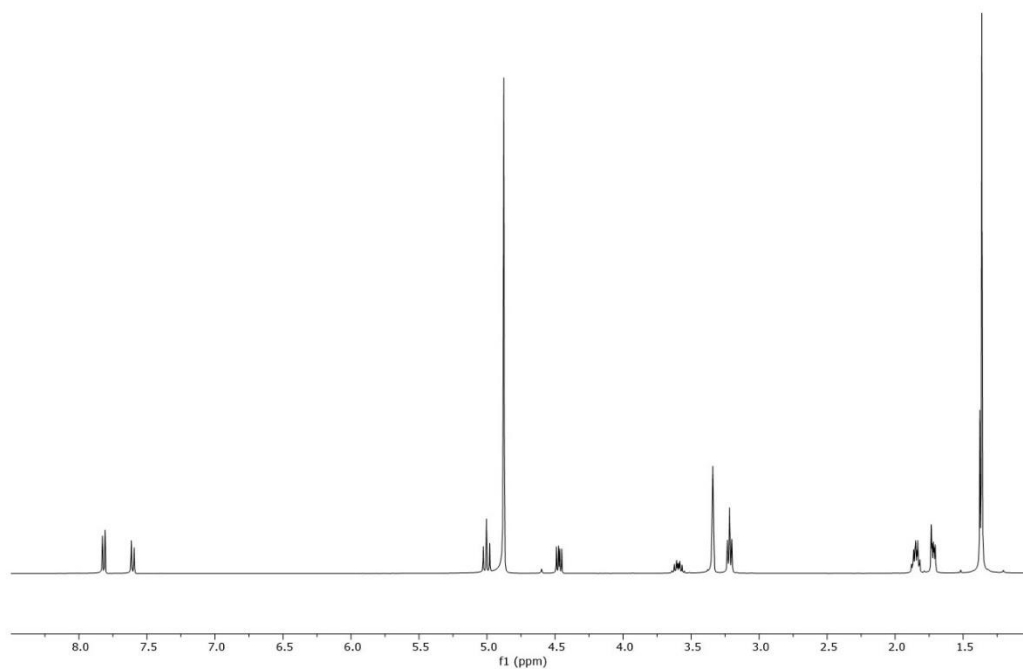

**Figure S4.** <sup>1</sup>H NMR Spectrum (600 MHz, CD<sub>3</sub>OD) of compound **4**.

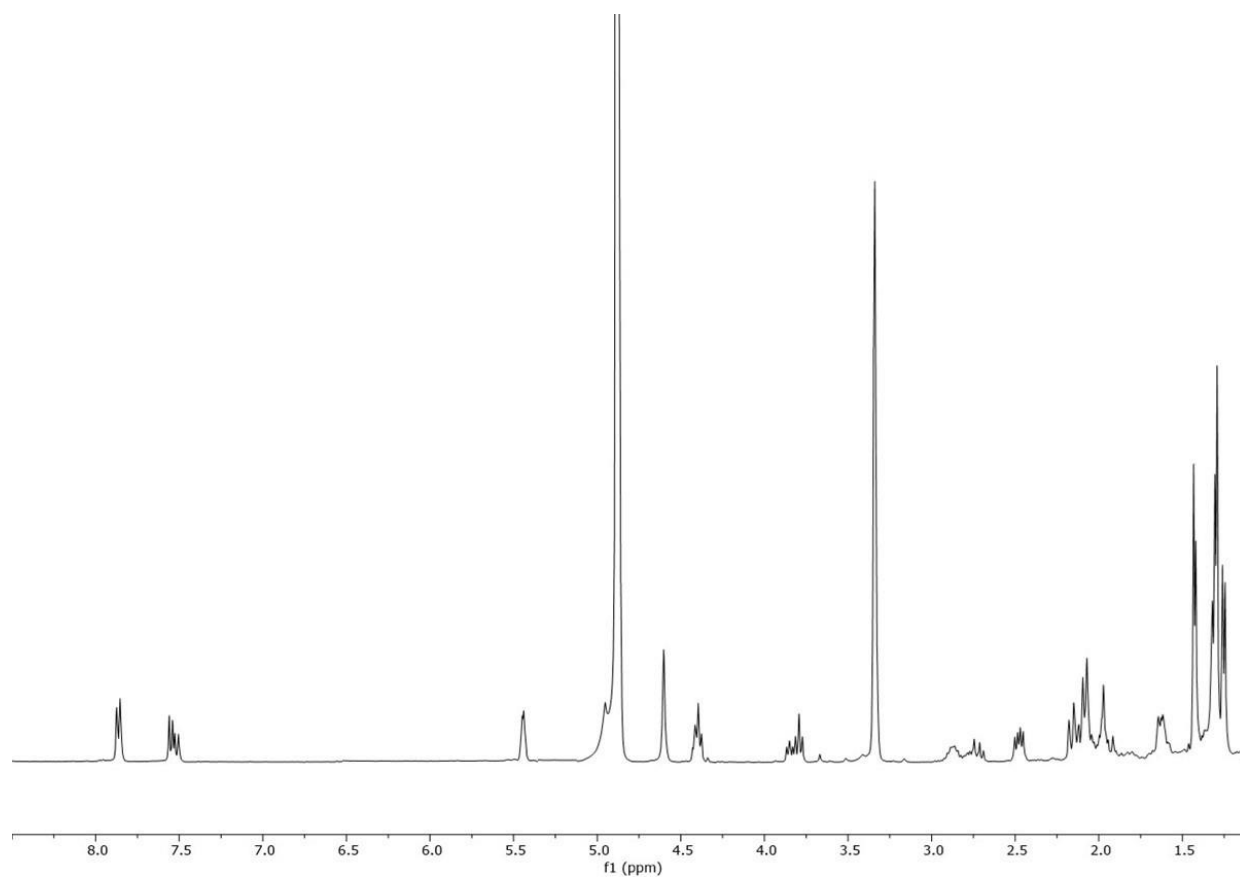

**Figure S5.**  $^1\text{H}$  NMR Spectrum (600 MHz,  $\text{CD}_3\text{OD}$ ) of compound **5**.

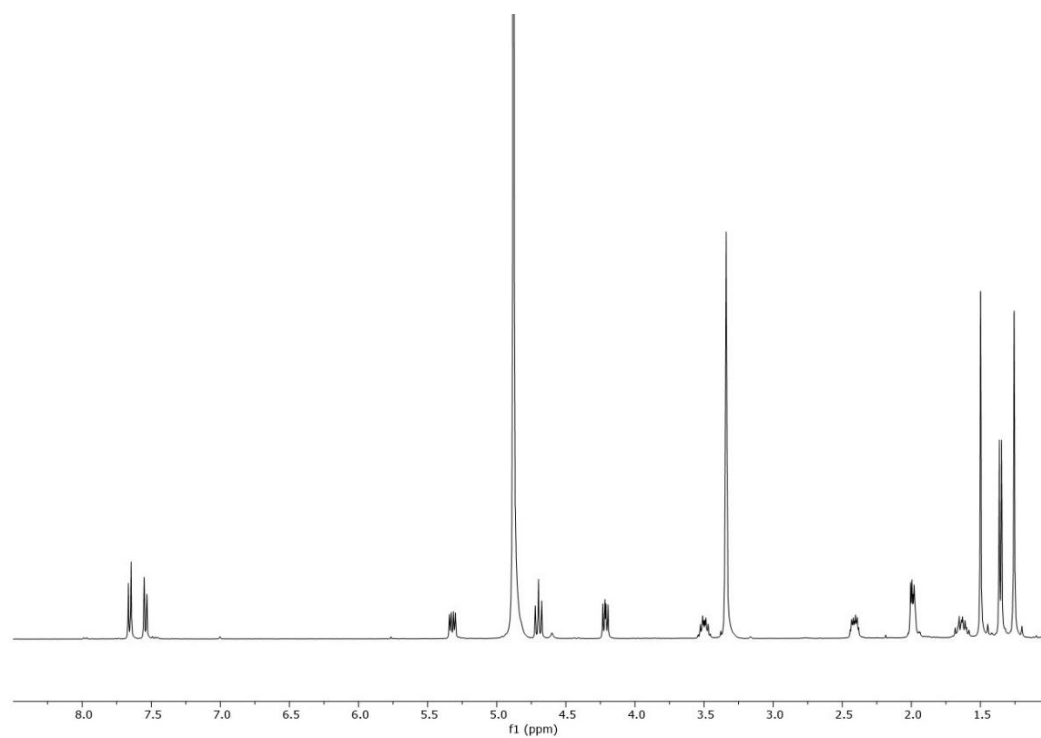

**Figure S6.**  $^1\text{H}$  NMR Spectrum (600 MHz,  $\text{CD}_3\text{OD}$ ) of compound **6**.

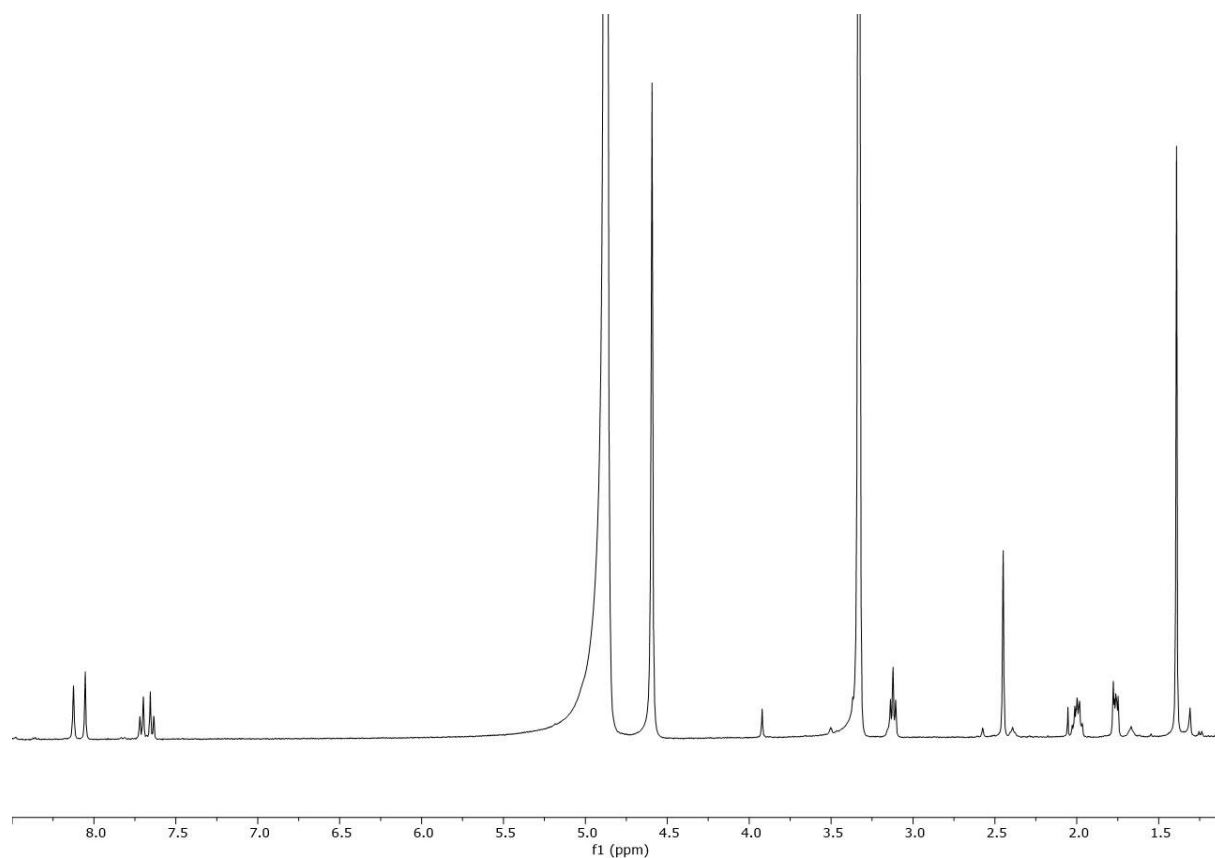

**Figure S7.**  $^1\text{H}$  NMR Spectrum (600 MHz,  $\text{CD}_3\text{OD}$ ) of compound **7**.

**Table S1.**  $^{13}\text{C}$ NMR Data (150 MHz,  $\text{CD}_3\text{OD}$ ,  $\delta$  ppm) of compounds **1-7**.

| position | 1                   | 2                   | 3                   | 4                   | 5                   | 6                   | 7                   |
|----------|---------------------|---------------------|---------------------|---------------------|---------------------|---------------------|---------------------|
| 1        | 29.8, $\text{CH}_2$ | 64.4, $\text{CH}$   | 200.1, $\text{C}$   | 30.3, $\text{CH}_2$ | 63.5, $\text{CH}$   | 79.0, $\text{CH}$   | 29.6, $\text{CH}_2$ |
| 2        | 19.3, $\text{CH}_2$ | 27.9, $\text{CH}_2$ | 26.9, $\text{CH}_2$ | 19.8, $\text{CH}_2$ | 27.0, $\text{CH}_2$ | 26.7, $\text{CH}_2$ | 20.4, $\text{CH}_2$ |
| 3        | 38.1, $\text{CH}_2$ | 32.5, $\text{CH}_2$ | 37.0, $\text{CH}_2$ | 38.6, $\text{CH}_2$ | 32.1, $\text{CH}_2$ | 37.9, $\text{CH}_2$ | 38.9, $\text{CH}_2$ |
| 4        | 35.5, $\text{C}$    | 36.4, $\text{C}$    | 35.6, $\text{C}$    | 35.8, $\text{C}$    | 35.3, $\text{C}$    | 35.8, $\text{C}$    | 36.0, $\text{C}$    |
| 5        | 150.3, $\text{C}$   | 150.7, $\text{C}$   | 155.7, $\text{C}$   | 152.7, $\text{C}$   | 149.7, $\text{C}$   | 146.0, $\text{C}$   | 149.2, $\text{C}$   |
| 6        | 134.3, $\text{CH}$  | 135.8, $\text{CH}$  | 132.2, $\text{CH}$  | 133.6, $\text{CH}$  | 134.8, $\text{CH}$  | 130.7, $\text{CH}$  | 127.7, $\text{CH}$  |
| 7        | 123.0, $\text{CH}$  | 123.1, $\text{CH}$  | 125.6, $\text{CH}$  | 123.4, $\text{CH}$  | 122.8, $\text{CH}$  | 132.9, $\text{CH}$  | 132.9, $\text{CH}$  |
| 8        | 127.5, $\text{C}$   | 146.6, $\text{C}$   | 129.7, $\text{C}$   | 126.6, $\text{C}$   | 138.0, $\text{C}$   | 128.8, $\text{C}$   | 134.5, $\text{C}$   |
| 9        | 126.8, $\text{C}$   | 128.6, $\text{C}$   | 131.0, $\text{C}$   | 128.5, $\text{C}$   | 128.7, $\text{C}$   | 124.4, $\text{C}$   | 138.9, $\text{C}$   |
| 10       | 143.9, $\text{C}$   | 129.3, $\text{C}$   | 139.0, $\text{C}$   | 144.1, $\text{C}$   | 146.7, $\text{C}$   | 149.1, $\text{C}$   | 134.9, $\text{C}$   |
| 11       | 185.0, $\text{C}$   | 185.0, $\text{C}$   | 186.0, $\text{C}$   | 185.0, $\text{C}$   | 185.2, $\text{C}$   | 170.5, $\text{C}$   | 113.5, $\text{CH}$  |

|    |                       |                       |                       |                       |                       |                       |                       |
|----|-----------------------|-----------------------|-----------------------|-----------------------|-----------------------|-----------------------|-----------------------|
| 12 | 175.8, C              | 176.0, C              | 175.3, C              | 176.3, C              | 176.0, C              | 168.2, C              | 155.1, C              |
| 13 | 121.0, C              | 121.0, C              | 122.0, C              | 119.3, C              | 119.0, C              | 114.8, C              | 180.4, C              |
| 14 | 161.5, C              | 163.2, C              | 161.4, C              | 171.5, C              | 171.0, C              | 161.0, C              | 148.7, C              |
| 15 | 141.6, CH             | 143.4, CH             | 143.2, CH             | 82.1, CH <sub>2</sub> | 77.8, CH <sub>2</sub> | 79.1, CH <sub>2</sub> | 144.9, CH             |
| 16 | 121.0, C              | 121.4, C              | 123.0, C              | 34.5, CH              | 34.7, CH              | 39.6, CH              | 22.2, CH <sub>3</sub> |
| 17 | 9.2, CH <sub>3</sub>  | 9.4, CH <sub>3</sub>  | 8.9, CH <sub>3</sub>  | 19.4, CH <sub>3</sub> | 18.3, CH <sub>3</sub> | 19.2, CH <sub>3</sub> | 31.2, CH <sub>3</sub> |
| 18 | 31.8, CH <sub>3</sub> | 31.9, CH <sub>3</sub> | 29.0, CH <sub>3</sub> | 31.8, CH <sub>3</sub> | 31.5, CH <sub>3</sub> | 31.9, CH <sub>3</sub> | 31.2, CH <sub>3</sub> |
| 19 | 31.8, CH <sub>3</sub> | 33.9, CH <sub>3</sub> | 29.0, CH <sub>3</sub> | 31.9, CH <sub>3</sub> | 31.5, CH <sub>3</sub> | 31.9, CH <sub>3</sub> | -                     |

**Table S2.** LC–MS/MS conditions for quantitation of compounds 1-7 by MRM.

| Compound                                                       | DP     | CE    | EP   | CXP   |
|----------------------------------------------------------------|--------|-------|------|-------|
| tanshinone II A (1)                                            | +187.0 | +26.6 | +6.6 | +23.8 |
| 1 $\alpha$ -hydroxy-tanshinone (2)                             | +95.7  | +30.0 | +6.8 | +19.2 |
| 1-oxo -tanshinone (3)                                          | +110.4 | +30.0 | +6.9 | +12.9 |
| cryptotanshinone (4)                                           | +187.9 | +29.6 | +5.0 | +18.7 |
| 1 $\beta$ - hydroxy-cryptotanshinone (5)                       | +84.1  | +29.6 | +7.3 | +19.4 |
| 1 $\alpha$ -hydroxyanhydride-16 <i>R</i> -cryptotanshinone (6) | +113.7 | +29.6 | +6.6 | +15.8 |
| salviolone (7)                                                 | +111.5 | +29.6 | +6.9 | +14.7 |

**DP**, Declustering Potential; **CE**, Collision energy; **EP**, Entrance potential; **CXP**, Collision Cell Exit Potential.
